# Supplementary material for: Supramolecular assembly of a quaterthiophene surfactantElectronic supplementary information (ESI) available: synthetic procedures and spectral characterization of 1 and precursors of Scheme 1. See http://www.rsc.org/suppdata/cc/b3/b316657k/
Source: Royal Society of Chemistry journal article supplement (doi:10.1039/b316657k), 2004-01-01
Supplement: b316657k.doc [file b316657k.doc]

**Supplemental Information**

**General**. All solvents and reagents were of reagent grade purity and used as supplied by the manufacturer unless stated otherwise. Nuclear magnetic resonance (NMR) analyses were performed on a Bruker DRX 400 (Billerica, MA) with a resonance frequency of 400.1 MHz for 1H and 100.6 MHz for 13C. Infrared absorption spectra were taken on a Perkin-Elmer 1750 FTIR Spectrometer (Norwalk, CT). Elemental analyses were performed by Desert Analytics (Tucson, AZ). Analytical thin-layer chromatography (TLC) was performed using E. Merck silica gel 60 F-254 polyester-backed plates (250 m thickness).

**2-(5-bromo-2-thienyl) ethyl acetate.** To a 250 mL round-bottom flask were added 2-(2-thienyl) ethanol (3.2g, 25 mmol), acetic anhydride (2.54 mL, 2.76g, 27 mmol), triethylamine (4.2 mL, 3.03g, 30 mmol), a catalytic amount of 4-(*N, N’*-dimethylamino) pyridine (DMAP) and methylene chloride (40 mL). The reaction mixture was stirred at room temperature and monitored by TLC. After 30 minutes, TLC showed the disappearance of 2-(2-thienyl) ethanol and the reaction was worked up by washing the organic layer with 5% HCl solution (30 mL), 5% NaOH solution (30 mL), followed by brine (40 mL).

The organic layer was then added directly into a 250 mL round-bottom flask along with acetic acid (20 mL) and *N*-bromosuccinimide (NBS, 4.5g, 25 mmol). The reaction mixture was stirred at room temperature for two hours in the dark to avoid side-chain bromination. The reaction was worked up by washing the organic layer with water (30 mL), 5% NaOH solution (30 mL), and then brine (30 mL). The organic layer was dried over anhydrous magnesium sulfate (MgSO4), filtered, and condensed *in vacuo* to yield a colorless oil, which was then purified by flash column chromatography using ethyl acetate/hexanes (1/6, *Rf* 0.40) to afford pure product (6.1g, 98% yield). 1H NMR (CDCl3)  6.88 (1H, d, 4.0 Hz, Ar-*H*), 6.62 (1H, d, 4.0 Hz, Ar-*H*), 4.24 (2H, t, 6.0 Hz, -C*H2*OAc), 3.07 (2H, t, 6.0 Hz, ArC*H2*-), 2.07 (3H, s, C*H3*COO-). 13C NMR (CDCl3)  170.8, 141.7, 129.5, 125.9, 110.0, 64.1, 29.6, 20.9.

**5-(2-acetyloxyethyl)-2,2’-bithiophene.** To a 250 mL round-bottom flask were added 2-(tributylstannyl) thiophene (10.5g, 28.2 mmol), 2-(5-bromo-2-thienyl) ethyl acetate (6.1g, 24.5 mmol), dichlorobis(triphenylphosphine)palladium(II) (180mg) and dry *N, N’*-dimethylformamide (DMF, 40 mL). The reaction mixture was heated at 80 oC for two days under nitrogen. After the reaction mixture was cooled to room temperature, DMF was removed under vacuum and the crude product flash column chromatographed with 17 % ethyl acetate/hexanes (*Rf* = 0.35) as the eluent to afford the pure product (4.0g, 65% yield). 1H NMR (CDCl3)  7.21 (1H, dd, 1.0 & 4.8 Hz, Ar-*H*), 7.14 (1H, dd, 1.0 & 3.4 Hz, Ar-*H*), 7.04-7.01 (2H, m, Ar-*H*), 6.78 (1H, d, 3.6 Hz, Ar-*H*), 4.32 (2H, t, 6.8 Hz, -C*H2*OAc), 3.14 (2H, t, 6.8 Hz, ArC*H2*-), 2.11 (3H, s, C*H3*COO-). 13C NMR (CDCl3)  170.9, 139.2, 137.5, 136.0, 127.7, 126.2, 124.1, 123.5, 123.4, 64.4, 29.5, 21.0.

**5-(2-acetyloxyethyl)-5’-bromo-2, 2’-bithiophene.** To a 100 mL round-bottom flask was added 5-(2-acetyloxyethyl)-2,2’-bithiophene (4.0g, 15.9 mmol), DMF (20 mL) and NBS (2.97g, 16.7 mmol). The reaction mixture was stirred at room temperature for two hours in the dark. The reaction was worked up by washing the organic layer with water (30 mL), 5% NaOH solution (30 mL), and then brine (40 mL). The organic layer was further dried over anhydrous MgSO4, filtered, then concentration *in vacuo* to give a light color solid, which was purified by flash column chromatography using 17% ethyl acetate/hexanes (*Rf* = 0.35) to afford pure product (4.9g, 93%). 1H NMR (CDCl3)  6.95 (1H, d, 4.0 Hz, Ar-*H*), 6.94 (1H, d, 3.6 Hz, Ar-*H*), 6.85 (1H, d, 3.6 Hz, Ar-*H*), 6.76 (1H, d, 3.6 Hz, Ar-*H*), 4.30 (2H, t, 6.6 Hz, -C*H2*OAc), 3.12 (2H, t, 6.6 Hz, ArC*H2*-), 2.09 (3H, s, C*H3*COO-). 13C NMR (CDCl3)  170.9, 139.8, 138.9, 135.0, 130.5, 126.3, 123.8, 123.4, 110.6, 64.3, 29.5, 21.0.

**5-(2-acetyloxyethyl)-2,2':5',2'': 5'',2''':5''',2'''': 5'''',2'''''-quaterthiophene.** To a 250 mL round-bottom flask was added 5-(tributylstannyl)-2, 2’-bithiophene (13.2g, 28.9 mmol), 5-(2-acetyloxyethyl)-5’-bromo-2, 2’-bithiophene (8.7g, 26.3 mmol), dichlorobis(triphenylphosphine)palladium(II) (240mg), and dry DMF (40 mL). The reaction mixture was heated at 80 oC for two days under nitrogen. After the reaction mixture was cooled to room temperature, methanol (MeOH, 150 mL) was added into the reaction mixtures and the product fell out of solution as fine light yellow crystals (8.5g, 77%). The compound was further purified by either flash column chromatography using toluene (*Rf* = 0.28) or recrystallized from toluene. 1H NMR (CDCl3)  7.23 (1H, d, 5.2 Hz, Ar-*H*), 7.17 (1H, d, 3.2 Hz, Ar-*H*), 7.09-7.00 (6H, m, Ar-*H*), 6.77 (1H, d, 3.6 Hz, Ar-*H*), 4.31 (2H, t, 6.0 Hz, -C*H2*OAc), 3.13 (2H, t, 8.0 Hz, ArC*H2*CH2OAc), 2.09 (3H, s, -OCOC*H3*). 13C NMR (CDCl3)  170.9, 139.6, 137.0, 136.4, 136.2, 135.9, 135.7, 135.6, 127.9, 126.4, 124.5, 124.4, 124.2 (2), 124.0, 123.7, 123.5, 64.4, 29.5, 21.0.

**5-(2-hydroxyethyl)-2,2':5',2'': 5'',2''':5''',2'''': 5'''',2'''''-quaterthiophene.** To a 250 mL round-bottom flask was added 5-(2-acetyloxyethyl)-2,2':5',2'': 5'',2''':5''',2'''': 5'''',2'''''-quaterthiophene (2.0g, 4.8 mmol), THF (75 mL), MeOH (25 mL), and NaOH (1.0g). The reaction mixtures were heated to gentle reflux for two hours under nitrogen and then cooled to room temperature. The resulting yellow crystals were filtered out of the solution and dried under vacuum (1.6g, 89%). 1H NMR (CDCl3)  7.23 (1H, d, 4.8 Hz, Ar-*H*), 7.18 (1H, d, 3.0 Hz, Ar-*H*), 7.08-7.00 (6H, m, Ar-*H*), 6.80 (1H, d, 3.6 Hz, Ar-*H*), 3.90 (2H, q, 6.0 Hz, ArCH2C*H2*OH), 3.07 (2H, t, 6.0 Hz, ArC*H2*CH2OH), 1.58 (1H, t, 6.0 Hz, -CH2O*H* ).

**5-(3,6,9,12-tetraoxy-tridecyl)-2,2':5',2'': 5'',2''':5''',2'''': 5'''',2'''''-quaterthiophene.** To a 250 mL round-bottom flask was added 5-(2-hydroxyethyl)-2,2':5',2'': 5'',2''':5''',2'''': 5'''',2'''''-quaterthiophene (1.34g, 3.6 mmol), 60% oil dispersion sodium hydride (NaH, 0.43g, 10.7 mmol), mesylated triethylene glycol monomethyl ether (2.42g, 10 mmol), and THF (60 mL). The reaction mixture was heated to gentle reflux overnight under nitrogen and then cooled to room temperature. After evaporation of the solvent under reduced pressure, the residuals were subject to flash column chromatography using 66% ethyl acetate/hexanes (*Rf* = 0.28) to afford the pure product (0.65g, 35%). 1H NMR (CDCl3)  7.22 (1H, d, 4.8 Hz, Ar-*H*), 7.17 (1H, d, 3.6 Hz, Ar-*H*), 7.08-6.98 (6H, m, Ar-*H*), 6.76 (1H, d, 3.6 Hz, Ar-*H*), 3.73 (2H, t, 6.8 Hz, -OC*H2*CH2O-), 3.70-3.63 (10H, m, -OC*H2*CH2O-), 3.54 (2H, dd, 4.2 Hz, 4.0 Hz, -OC*H2*CH2O-), 3.38 (3H, s, -OC*H3*), 3.08 (2H, t, 6.8 Hz, -OC*H2*CH2Ar). 13C NMR (CDCl3)  141.1, 137.0, 136.7, 136.1, 135.9, 135.3, 135.2, 127.9, 126.0, 124.5, 124.3, 124.2, 124.0, 123.7, 123.6, 123.4, 71.9, 71.6, 70.6, 70.5, 70.4, 59.0, 30.7. Anal. Calcd for C25H28O4S4: C, 57.66; H, 5.42; S, 24.63. Found: C, 57.33; H, 5.80; S, 24.64.

Figure S1. UV-vis absorption of **1** in CHCl3 solutions at 10 µM (max = 396 nm), and as dispersed in water in vesicular form (max = 342 nm).

Figure S2. Cyro-TEM image of vesicle of **1** in water (1% ammonium molybdate stain).

Figure S3. Cryo-TEM image of **1** vesicles in water on holey carbon grid (1% ammonium molybdate stain).
